# Supplementary material for: Mixed synapses reconcile violations of the size principle in zebrafish spinal cord
Source: eLife. 2022 Sep 27;11:e64063. doi: 10.7554/eLife.64063 (PMC9514842; doi:10.7554/eLife.64063)
Supplement: Figure 1—source data 1. [file elife-64063-fig1-data1.xlsx]

## Sheet: Figure 1-source data 1
	Panel d																Panel e																Panel g
	MNs			Type I V2a			Type II V2a			V0d			dI6				MNs			Type I V2a			Type II V2a			V0d			dI6				MNs			Type I V2a			Unidentified V2a			Type II V2a			V0d			dI6
	Soma diameter (mm)	Rin (MW)		Soma diameter (mm)	Rin (MW)		Soma diameter (mm)	Rin (MW)		Soma diameter (mm)	Rin (MW)		Soma diameter (mm)	Rin (MW)			Tau (ms)	Rin (MW)		Tau (ms)	Rin (MW)		Tau (ms)	Rin (MW)		Tau (ms)	Rin (MW)		Tau (ms)	Rin (MW)			Peak Current (pA)	Rin (MW)		Peak Current (pA)	Rin (MW)		Peak Current (pA)	Rin (MW)		Peak Current (pA)	Rin (MW)		Peak Current (pA)	Rin (MW)		Peak Current (pA)	Rin (MW)
	5.56952	506.888		6.3064	469.132		7.05845	104.345		5.49491	261.738		5.94333	825.06			0.7	32.5		5.24838	469.132		2.97099	104.345		5.4927	261.738		13.13	825.06			257.904	42		56.0394	584.248		242.817	118.894		226.146	158.3		108.434	881.589		64.0497	206.956
	6.24823	349.943		5.5397	633.463		6.4214	89.7621		5.007	300.3		5.04333	1017.8			0.92	73.3		7.56314	633.463		2.24785	89.7621		3.49064	300.3		7.59	1017.8			173.567	114		81.0718	560.658		389.949	89.262		398.991	67.4904		76.6577	477.346		149.571	333.661
	7.87552	47.6305		5.27366	963.319		6.37121	74.2582		5.50256	423.839		7.30333	751.68			0.78	43.6		14.5575	963.319		1.49755	74.2582		4.91901	423.839		7.93	751.68			778.697	69		32.3431	499.347		265.591	71.3602		327.251	148.028		174.466	329.584		86.9816	302.938
	7.00831	155.381		4.85015	1070.51		6.82303	91.8634		4.40025	477.346		6.07	514.14			0.91	25.7		13.018	1070.51		1.43619	91.8634		6.35935	477.346		8	514.14			412.558	43.64		126.18	594.198		192.693	310.743		350.864	85.226		154.651	283.565		80.1917	151.827
	8.84795	48.7698		6.20656	695.963		6.54811	73.0404		4.2179	336.597		7.01	255.69			0.7	55.5		12.9513	695.963		2.32974	73.0404		3.2785	336.597		4.06	220.03			209.682	51		208.923	942.64		98.5628	381.73		408.316	90.9611		304.145	244.595		82.6061	266.727
	8.684	72.9784		6.71649	1194.61		6.57806	69.2231		4.91253	329.584		7.82667	220.03			0.82	55.2		10.8409	1194.61		2.24074	69.2231		7.21534	329.584		3.79	257.48			941.589	33		66.1011	942.64		173.736	165.176		423.168	136.236		149.583	362.668		385.4	145.13
	9.33873	63.6		6.89278	408.352		6.31911	115.73		5.36573	282.172		7.87	257.48			0.83	64.4		5.68903	408.352		2.97982	115.73		7.4776	282.172		4.04	291.7			309.97	47.15		186.175	723.776		361.762	95.8025		279.274	119.905		149.353	255.681		330.1	180.24
	8.57513	60.546		5.91069	797.096		6.34794	285.339		5.31584	314.012		6.63333	291.7			0.78	55.3		14.6951	797.096		7.63875	285.339		3.49494	314.012		12.43	885.08			532.345	51.1		150.247	679.904		150.063	245.888		264.184	141.992		327.245	239.181		240.3	172.75
	10.1362	49.9269		4.54148	673.588		6.63114	95.7019		5.86305	283.565		7.13667	885.08			0.81	83.8		14.3598	673.588		1.40173	95.7019		6.1285	283.565		4.01	264.11			573.421	112		66.6889	668.036		37.7805	966.998		219.873	184.204		162.567	153.571		237.2	182.65
	8.74297	50.2144		5.43583	566.558		7.34014	92.3071		4.76706	240.734		7.33667	264.11			1.4	268.7		12.0564	566.558		2.88714	92.3071		3.4713	240.734		4.83	202.92			334.618	44.77		40.633	1022.94		50.6233	927.753		758.857	77.1673		303.813	210.015		146.7	514.14
	6.62483	146.384		6.14575	658.54		6.7859	77.553		5.69799	244.595		5.52333	202.92			1.47	345.3		10.3951	658.54		1.7836	77.553		3.3066	244.595		4.43	302.17			391.582	45.33		144.499	525.06		101.476	342.023		286.247	204.692		291.31	211.674		83.6	790.43
	6.02588	332.207		5.49491	517.031		6.18446	146.165		5.79765	362.668		7.29667	302.17			1.67	527.4		10.2065	517.031		2.0949	146.165		8.00818	362.668		7.33	266.26			794.443	49.99		148.021	390.106		134.786	190.552		412.363	50.0421		430.954	154.529		62.4	885.08
	7.13599	153.498		5.50005	598.4		7.72568	54.7399		5.86707	881.589		7.45333	266.26			1.14	227.4		7.46073	598.4		2.3192	54.7399		15.912	881.589		6.73	464.13			136.751	177		69.6895	417.458		65.0406	558.194		296.098	145.22		162.745	218.344		87.1	1421
	7.33893	121.259		6.03289	636.994		6.60573	275.378		5.03757	536.97		8.74333	190.038			1.59	264.2		13.3286	636.994		4.09449	275.378		8.43395	536.97		6.19	472.59			114.162	242.57		52.168	954.828		90.6043	529.906		352.995	89.6223		60.7521	1407.54
	7.00567	283.273		5.07276	519.926		6.24993	103.551		4.61811	168.206		6.53	464.13			1.12	225.7		10.6231	519.926		2.30759	103.551		1.64201	168.206		3.6	291.16			109.455	340.01					54.3225	685.662		398.129	67.4904		189.756	259.545
	8.67368	66.8944		4.68444	697.636		7.53632	94.2755		5.39356	235.267		5.96333	245.88			1.13	243.8		12.6494	697.636		3.45383	94.2755		4.46541	235.267		6.34	180.71			143.311	264.97					370.774	40.0455		346.297	69.9148		80.5283	723.271
	6.58029	349.213		4.86375	566.524		6.80658	81.7553		5.56426	356.946		6.91	472.59			1.84	332.7		17.3858	566.524		1.88981	81.7553		3.94399	356.946		7.69	641.04			266.806	112.85					148.191	160.475		191.233	175.706		165.172	314.012
	5.8217	314.433		5.87022	746.752		7.46903	109.019		5.63158	210.015		8.14	291.16			1.77	354.9		14.0268	672.314		1.62093	109.019		2.54584	210.015		2.87	212.06			109.756	287					364.543	145.015		230.806	155.109
	8.10326	60.3158		6.20715	993.779		7.34014	86.8896		4.57233	310.669		7.72667	691.22			1.69	410.417		7.45569	589.414		2.16314	86.8896		3.67911	310.669		8.69	437.81			58.8546	830					311.783	168.337		252.958	143.056
	8.13785	73.0802		6.76525	395.722		7.52513	90.6014		4.51748	314.007		7.48667	180.71			2.03	486.4		11.3997	865.649		1.76178	90.6014		2.93321	314.007		10.12	1203.72			83.2192	393								360.533	136.236
	7.48215	139.357		6.477	616.606		6.44226	97.0995		4.88961	294.591		6.60333	641.04			2.19	615.9		5.90481	625.609		2.11276	97.0995		3.77779	294.591		3.62	111.47			66.9824	815.69								264.587	126.095
	6.70687	105.701		7.25943	778.29		5.87737	85.3393		5.64107	279.524		7.11667	212.06			1.72	328.98		10.1498	722.71		1.72031	85.3393		2.59008	279.524		6.81	287.88			57.2043	440.84								389.949	65.9859
	5.74933	229.255		5.51273	672.314		6.3058	61.995		5.29202	218.344		8.06333	1380.5			1.27	315.86		9.31973	642.388		0.974023	61.995		3.00507	218.344		4.4	133.77			40.019	861.9								518.599	148.227
	6.3449	406.844		4.27082	589.414		7.11298	64.0019		4.96369	271.394		5.31333	437.81			1.65	300.72		10.2524	707.16		1.8254	64.0019		3.97374	271.394		1.99	214.87												184.772	96.4659
	6.77265	166.412		5.64355	865.649		6.65862	65.485		5.13636	338.31		8.43	1203.72			1.92	383.32		13.109	876.311		1.32956	65.485		4.42241	338.31		5.78	355.65
	6.47766	487.295		5.09202	625.609		7.74567	74.0648		5.05137	356.06		8.04667	111.47			3.51	1493.42		15.0577	826.184		2.09012	74.0648		3.23054	356.06		6.56	420.29
	6.81677	296.638		5.9012	722.71		6.37661	73.4023		5.93203	154.529		7.55	287.88			2.35	619.2		20.5829	1098.93		2.38463	73.4023		3.12901	154.529		3.09	423.48
	8.07731	217.333		5.51019	642.388		8.68823	71.8543		4.9806	275.432		8.51667	133.77			2.41	585.94		22.2431	990.978		1.61167	71.8543		4.07739	275.432		4.74	238.55
	9.595	43.09		5.05885	707.16		6.7756	71.6124					7.01667	214.87			2.21	613.04		5.70703	499.121		1.58432	71.6124					3.74	151.76
	8.64234	49.4018		5.24135	876.311		7.09128	78.8898					6.95333	355.65			2.3	568.62		13.8672	718.561		3.28326	78.8898					13.72	968.33
	7.77849	67.2885		4.79981	826.184		6.59721	158.3					6.43333	420.29			1.45	221.925		12.1902	641.942		2.70106	158.3					4.55	132.1
	8.20121	75.9992		4.82316	1098.93		6.7507	112.265					7.87333	423.48			2.72	956.48		23.0803	1045.42		2.71341	107.871					3.7	170.61
	7.58395	81.2866		4.67246	990.978		6.29022	107.871					8.13667	238.55			1.92	554.6		19.3468	968.191		1.94644	108.815					5.87	223.39
	8.71237	46.1331		5.17675	499.121		6.00725	108.815					6.70667	151.76			1.37	217.76		19.2124	1236.4		2.05625	105.797					5.27	219.17
	10.3884	44.7665		4.68439	718.561		6.37441	105.797					6.46333	968.33			1.63	268.175		16.2086	772.15		1.87	71.4585					4.57	115.16
	8.38108	49.135		5.78838	641.942		6.41389	71.4585					6.65	132.1			2.39	737.16		10.4437	696.919		1.8487	88.203					10.77	1614.33
	8.09954	82.6067		5.08927	1045.42		6.30354	88.203					8.89667	170.61			1.78	275.2		18.0337	692.976		2.94014	304.55					4.48	112.16
	7.41591	171.544		6.27011	968.191		7.0893	304.55					8.99667	223.39			2.24	546.34		13.3774	882.784		3.85437	206.979					21.73	1426.2
	8.73789	71.9502		5.68814	1236.4		7.54488	206.979					6.41333	219.17			2.7	1078.3		12.3009	746.877		2.92519	131.044					5.08	201.3
	8.1743	64.2695		5.19836	772.15		7.41417	131.044					8.10333	115.16			2.59	939.94		23.1362	1069.08		2.46229	144.24					7.43	397.39
	8.26933	38.3355		5.78078	696.919		7.56419	144.24					7.34	1614.33			1.06	56.24		18.9658	1169.61		3.46788	142.682					9.69	929.25
	7.162	85.4115		6.7236	692.976		7.58087	142.682					7.82667	112.16						17.1943	1139.63		1.23642	75.6832					7.9	434.85
	5.4517	301.972		4.80278	882.784		6.19129	75.6832					7.33667	1426.2						9.94206	757.939		1.64534	96.6354					4.51	206.65
	7.9202	109.464		6.71108	746.877		6.52453	96.6354					7.98667	201.3						21.018	913.615		2.60432	207.333					13.99	630.65
	8.63733	82.7487		4.89534	1069.08		5.62211	207.333					8.72333	397.39						15.9076	1154.31		2.39206	105.513					13.89	869.79
	8.08332	77.2782		5.10306	1169.61		6.18209	105.513					6.41	929.25						17.2872	1218.47		1.81539	122.57					7.91	339.78
	5.27925	395.608		4.92965	1139.63		7.37258	122.57					8.09333	434.85						16.7296	1000.37		1.10602	76.1121					6.77	644.99
	6.22746	294.921		5.91073	757.939		6.13476	76.1121					7.08333	206.65						9.62958	1051.65		1.68755	193.625					4.27	252.79
	7.90885	58.9343		5.55081	913.615		6.59511	193.625					8.26667	211.94						9.45967	736.937		1.05323	68.7632					6.2	690.37
	8.64536	47.9428		5.09477	1154.31		6.68804	68.7632					6.22	630.65						11.0896	508.418		1.58647	108.626					5	123.17
	9.28938	39.1334		4.6665	1218.47		6.66913	108.626					7.23	869.79						15.7271	833.296		2.48859	154.519					3.7	240.03
	6.38227	278.724		5.36573	1000.37		7.57392	154.519					7.06667	339.78						18.7219	935.39		3.63746	93.294					5.07	148.68
	8.09026	60.8008		5.94386	1051.65		6.55669	93.294					8.27667	644.99						23.3831	1381.56		2.02403	128.515					6.23	211.48
	5.50437	500.49		6.60145	736.937		6.57164	128.515					7.79667	252.79						13.46	1090.24		1.64353	94.6622					4.43	331.69
	6.72493	239.466		6.05611	508.418		5.9932	94.6622					7.82667	690.37						15.8264	813.559		2.97731	76.0509					7.1	602.04
	6.01082	756.23		7.06154	833.296		6.66493	76.0509					8.20667	123.17						27.2551	874.292		3.84866	338.566					5.8	195.97
	5.00806	826.72		5.70045	935.39		6.31306	338.566					7.56	240.03						26.6725	878.7		1.4158	83.1702					6.58	205.49
	5.71399	557.913		6.09305	1381.56		6.31528	83.1702					7.01667	239.41						20.9301	1164.44		3.35013	65.0014					6.02	359.81
	6.73051	443.183		5.67331	1090.24		6.24092	50.4571					8.84667	331.69						18.214	851.961		1.61671	86.5654					5.36	282.14
	5.4416	554.444		5.24657	813.559		5.84386	65.0014					7.34	602.04						18.4471	1100.95		3.16981	144.931					14.47	486.65
	6.02454	359.5		4.98465	874.292		6.62059	86.5654					7.39667	195.97						13.8797	843.029		2.03727	156.263					3.02	127.99
	6.6604	248.687		5.1058	878.7		6.04681	144.931					8.41667	205.49						12.4077	746.702		2.94187	154.665					3.6	172.75
	6.62092	369.267		5.87499	1164.44		6.1183	156.263					8.98	359.81						14.5461	532.743		1.93775	86.3672					3.43	182.65
	5.84775	311.577		5.32319	851.961		6.76936	154.665					8.58	282.14						9.35893	601.772		3.14806	158.874					2.84	180.24
	5.78838	491.597		6.20472	1100.95		7.01966	86.3672					7.33	486.65						11.4355	784.27		2.91452	129.921					4.14	207.97
	9.43609	42.0599		5.63112	843.029		6.20715	158.874					7.23333	127.99						21.9681	917.784		2.05997	77.5023					3.74	207.09
	5.92282	282.602		5.19583	746.702		7.12875	129.921					6.85	172.75						7.68561	455.385		4.55459	213.49					3.97	136.84
	5.49464	653.472		6.13687	532.743		7.16215	77.5023					8.67667	182.65						8.66538	690.486		2.76049	69.4194					2.42	238.85
	5.04927	303.19		5.90358	601.772		6.13894	69.4194					7.77	180.24						12.0114	773.913		4.22467	149.33					3.93	246.39
	5.48958	300.226		4.78817	784.27		6.64805	149.33					7.93667	207.97						17.6732	1024.71		2.04068	82.948					3.2	314.06
	5.7501	377.87		4.68144	917.784		6.32133	82.948					6.58667	207.09						12.4143	627.883		2.17135	119.049
	5.81933	530.092		5.45789	455.385		7.65456	77.4794					7.61333	136.84						13.2676	1071.93		1.90232	77.4794
	5.39312	494.079		5.70045	690.486		7.10904	213.49												9.83139	603.024		1.9738	62.1385
	6.7418	338.287		4.90682	773.913		6.97353	119.049												7.57187	568.741		1.1723	85.0162
	5.67024	663.45		5.37356	1024.71		6.56954	62.1385												16.0819	672.729		2.01733	99.4436
	5.99929	362.372		5.4152	627.883		6.44506	85.0162												16.5948	671.658		2.29516	54.3613
	5.77409	385.55		6.40511	1071.93		6.61421	99.4436												11.1601	649.141		2.02353	119.405
	6.53691	344.055		5.83907	603.024		6.21391	54.3613												10.6942	738.589		3.03635	111.044
	6.02849	371.312		5.52551	568.741		7.31334	119.405												15.7332	791.5		3.26979	125.272
	5.77038	772.4		5.17129	672.729		6.40293	111.044												18.2625	1144.87		1.8939	109.508
	6.55715	302.58		5.84147	671.658		6.69851	125.272												9.65874	478.036		2.03321	180.793
	5.88351	329.59		5.44359	649.141		6.05607	109.508												13.498	684.142		2.76226	61.3007
	5.98033	431.031		5.38398	738.589		5.7738	61.3007												10.6764	594.198		3.61094	180.166
	5.81334	730.024		6.19355	791.5		6.55025	180.166												12.5349	668.036		1.53336	128.293
	5.21068	994.024		5.42554	1144.87		6.61845	128.293												17.7051	942.64		2.65197	123.821
	6.91139	62.4971		5.13317	478.036		7.30372	75.1874												13.4767	900.922		1.74157	75.1874
	6.38064	302.89		5.29463	684.142		6.52882	180.793												8.54304	656.386		1.54647	82.684
	5.52889	638.886		5.41163	594.198		7.23817	123.821												9.62854	612.832		1.30252	126.508
	5.64152	369.033		5.21727	668.036		7.18565	82.684												16.2132	584.248		2.26441	209.61
	7.36901	216.9		4.8195	942.64		6.08381	126.508												15.9226	805.767		1.38704	88.5158
	5.86486	327.573		5.46931	900.922		6.12291	209.61												9.5979	560.658		2.39115	134.767
	6.64313	294.245		5.98721	656.386		5.51023	88.5158												11.0631	499.347		3.54328	220.269
	6.1159	292.412		5.85279	612.832		6.00258	134.767												7.29766	495.855		1.91173	101.805
	5.11536	732.295		5.30257	584.248		5.79805	220.269												17.2436	559.667		2.11284	167.262
	6.71525	186.864		5.17675	805.767		6.80864	101.805												19.3565	846.417		2.80368	155.783
	5.54618	970.727		5.37356	560.658		6.90887	167.262												11.6047	878.353		1.27841	59.6028
	6.95872	228.407		5.48726	499.347		6.58232	155.783												6.6833	390.106		2.68414	127.434
	7.35785	262.45		5.1984	495.855		8.42088	80.6095												9.66513	723.776		1.99385	124.879
	6.64259	427.975		5.16587	559.667		6.67543	59.6028												14.5258	679.904		3.12185	102.923
	5.96501	456.244		4.8079	846.417		6.22293	127.434												4.23672	418.672		2.01611	92.7707
	6.23765	295.413		5.73717	878.353		4.71408	124.879												25.012	1022.94		2.65287	101.03
	5.77038	265.98		5.39092	390.106		6.10492	102.923												14.4871	525.06		1.41613	128.455
	6.69544	227.505		5.59925	723.776		8.44809	93.5838												10.3492	390.106		1.39752	174.454
	5.39411	374.157		5.52397	679.904		7.92207	47.2519												7.01646	417.458		1.08872	111.683
	5.68051	684.66		7.10459	418.672		5.68336	92.7707												22.2506	954.828		1.95388	143.19
	7.40718	158.235					5.97209	101.03															1.7904	93.5838
							7.11244	128.455															1.92726	121.833
							5.92153	174.454															2.50493	90.0562
							6.60358	111.683															1.75232	82.4317
							6.49275	143.19															2.64158	127.365
							5.89404	121.833															2.43206	131.369
							6.43352	90.0562															3.56177	173.614
							6.35015	82.4317															3.1204	152.494
							7.27678	127.365															1.45038	92.9189
							8.04945	131.369															1.06905	77.8613
							6.81275	173.614															3.23857	162.358
							7.87678	152.494															1.67252	101.724
							7.46903	92.9189															2.02812	93.5846
							7.57905	77.8613															1.59348	109.451
							7.2343	162.358															1.91639	148.024
							6.94534	101.724															3.37202	64.4949
							7.17583	93.5846															3.33467	100.024
							6.68595	109.451															2.11955	226.712
							5.60861	148.024															3.27885	114.572
							5.7054	64.4949															3.35582	172.728
							5.81012	100.024															1.87999	118.701
							5.86783	226.712															2.28997	85.226
							6.65648	114.572															4.65343	65.9859
							8.39085	172.728															4.56759	118.711
							6.48569	118.701															4.95659	184.666
							6.81275	85.226															2.6393	119.905
							7.55121	65.9859															2.53154	105.661
							7.0057	118.711															3.09519	105.527
							6.55242	184.666															3.29836	162.503
							6.48781	119.905															3.71573	86.1995
							7.0972	105.661															2.37512	91.4582
							6.71108	105.527															2.92383	149.941
							6.64173	162.503															1.63683	67.9785
							6.89463	86.1995															2.17011	176.928
							6.68595	91.4582															1.23147	84.786
							5.61114	149.941															2.41541	242.519
							6.26601	67.9785															1.11532	50.0421
							5.76183	176.928															3.53749	145.22
							5.21988	84.786															2.20744	89.6223
							5.17921	242.519															2.7231	67.4904
																							3.59364	69.9148
																							4.54486	175.706
																							2.4124	155.109
																							2.29754	143.056
																							2.76488	136.236
																							1.61135	126.095
																							4.65343	65.9859
																							3.31515	148.227
																							3.51875	96.4659
