# Supplementary material for: Mixed synapses reconcile violations of the size principle in zebrafish spinal cord
Source: eLife. 2022 Sep 27;11:e64063. doi: 10.7554/eLife.64063 (PMC9514842; doi:10.7554/eLife.64063)
Supplement: Figure 2—source data 1. [file elife-64063-fig2-data1.xlsx]

## Sheet: Figure 2-source data 1
		Panel d			Panel e			Panel f			Panel g			Panel h			Panel i			Panel j			Panel k				Panel l
		Electrical synapse			Electrical synapse			Mixed synapse			Chemical synapse			Chemical synapse			Chemical synapse			Chemical synapse							Delta Rin
		EPSP amp (mV)	Rin (MW)		Ohmic current (pA)	Rin (MW)		eEPSP amp (mV)	cEPSP failure (%)		cEPSP amp (mV)	cEPSP failure (%)		EPSP amp (mV)	Rin (MW)		Ohmic current (pA)	Rin (MW)		Decay tau (ms)	Rin (MW)		Soma diameter (mm)	Control Rin (MW)	18BGA Rin (MW)		18BGA (% control)	NBQX (% control)	NBQX/APV (% control)	Control Rin for 18BGA
		1.64436	168.206		9.77587	168.206		3.12035	70.5883		2.97884	77.1429		2.97884	79.9347		37.2659	79.9347		0.684211	79.9347		10	60.562	543.324		897.137	103.909	99.7197	60.562
		0.401286	310.669		1.29168	310.669		4.54237	15.5556		1.23214	83.9286		1.23214	56.3153		21.8793	56.3153		0.614227	56.3153		10.9	42.7257	103.496		242.234	120.614	104.569	42.7257
		0.5239	477.346		1.09753	477.346		1.97443	67.5		1.17983	63.3333		1.17983	38.4051		30.7207	38.4051		0.971384	38.4051		7.3	50.8479	162.774		320.119	97.4709	93.859	50.8479
		2.27537	294.591		7.72383	294.591		1.54799	78.5713		2.38898	91.8699		2.38898	52.5394		45.4703	52.5394		0.656051	52.5394		7.1	131.947	372.412		282.243	107.76	102.836	131.947
		3.56705	54.3214		65.6656	54.3214		5.57367	17.9488		2.04234	43.75		2.04234	45.4573		44.9288	45.4573		0.687386	45.4573		8.5	84.5767	272.99		322.772	106.75	107.824	84.5767
		3.12035	23.8089		131.058	23.8089		2.1069	90		1.58965	73.2143		1.6508	18.3595		89.9153	18.3595		0.493084	18.3595		11.2	61.52	164.684		267.692	120.119		61.52
		4.54237	40.0211		113.499	40.0211		7.11271	24.2424		1.64781	81.7204		1.58965	64.2199		24.7532	64.2199		0.741881	64.2199		9.2	86.4076	299.449		346.555	103.781		86.4076
		1.97443	54.6373		36.137	54.6373		3.20258	63.8298		3.5112	87.3786		0.830418	51.0472		16.2676	51.0472		0.564064	51.0472		7.9	84.6241	181.829		214.867	106.002		84.6241
		1.54799	73.1081		21.174	73.1081		1.32679	92.8571		1.48215	60.5634		0.624248	27.9229		22.3561	27.9229		0.962415	27.9229		8.7	93.0722	141.6		152.14	88.3106		93.0722
		5.57367	67.9673		82.0052	67.9673		2.32658	40.9091		0.822974	64.7059		0.947525	55.0914		17.1992	55.0914		1.01461	55.0914		6.5	201.63	435.943		216.21	105.105		201.63
		2.1069	53.6073		39.3025	53.6073		0.958519	88		1.33959	75		1.64781	64.6361		25.4936	64.6361		0.690498	64.6361		9	81.2763	261.538		321.789	91.3493		81.2763
		7.11271	91.6509		77.6065	91.6509		7.6768	0		1.6508	83.5052		3.5112	42.0556		83.4895	42.0556		0.429737	42.0556		6.6	173.153	906.936		523.777	80.6311		173.153
		3.20258	32.5283		98.4552	32.5283		2.35438	84.1463		1.52386	85		1.48215	34.9693		42.3843	34.9693		0.572194	34.9693		5.8	316.94	507.05		159.983	97.3026		316.94
		1.32679	51.9854		25.5224	51.9854		2.54053	56.5657		1.27743	74.5763		0.841485	51.1667		16.446	51.1667		0.646023	51.1667		5.2	572.172	1242.72		217.193	99.9073		572.172
		2.32658	74.1326		31.384	74.1326		3.69714	74.8092		2.07891	94.2308		1.03293	46.689		22.1236	46.689		0.276239	46.689		5.5	455.453	963.803		211.614			455.453
		0.958519	56.5807		16.9407	56.5807		0.913223	27.5		0.830418	94.5946		0.566439	33.0441		17.1419	33.0441		0.44498	33.0441		6.4	172.728	329.239		190.611			172.728
		7.6768	49.2835		155.768	49.2835		1.18675	78.2946		0.624248	89.84		1.37575	74.4932		18.4681	74.4932		1.05226	74.4932		8.3	121.739	457.664		375.939			121.739
		2.35438	73.6486		31.9677	73.6486		0.486038	90.566		0.947525	88.334		1.12993	58.7563		19.2308	58.7563		0.941711	58.7563		7.1	136.447	262.714		192.539			136.447
		2.54053	92.4727		27.4733	92.4727		2.24979	42.5532		0.841485	88.8		0.822974	36.6349		22.4642	36.6349		0.782457	36.6349		8.6	111.321	198.208		178.051			111.321
		3.69714	52.278		70.7208	52.278		1.41781	60		1.03293	97.791		1.14886	76.615		14.9952	76.615		0.547181	76.615		5.4	252.19	590.347		234.088			252.19
		0.913223	75.6745		12.0678	75.6745		1.55176	88.6792		0.566439	93.3333		0.68832	64.7419		10.6318	64.7419		1.21744	64.7419		4.9	1026.67	1303.06		126.921			1026.67
		1.18675	40.2712		29.469	40.2712		7.15646	11.1111		1.37575	97.8261		2.2188	74.6513		29.7222	74.6513		1.12528	74.6513		4.49	845.104	1147.2		135.747			845.104
		0.486038	42.2394		11.5067	42.2394		1.08283	83.5165		1.12993	77.86		1.18036	53.1801		22.1955	53.1801		0.982877	53.1801		5.4	1025.11	1284.93		125.346			1025.11
		2.24979	65.7699		34.207	65.7699		1.08914	51.6667		1.14886	96.86		1.33959	73.109		18.3232	73.109		1.07154	73.109
		1.41781	81.4254		17.4124	81.4254		0.483948	92.8571		0.68832	90.91		1.39661	153.813		9.07992	153.813		1.39646	153.813
		1.55176	96.3284		16.1091	96.3284		3.3795	35.7143		2.2188	74		1.25631	143.454		8.75758	143.454		2.37574	143.454
		7.15646	44.9346		159.264	44.9346		4.0117	42.8571		1.18036	70		1.41051	27.9229		50.5145	27.9229		0.682811	27.9229
		1.08283	37.8702		28.5932	37.8702		2.91594	33.3333		1.39661	48		1.52386	267.87		5.6888	267.87		0.877375	267.87
		0.483948	91.9594		5.26263	91.9594		3.70882	36.1111		1.25631	93.33		1.27743	45.0236		28.3725	45.0236		0.674179	45.0236
		3.3795	62.8083		53.8066	62.8083		1.03165	74.3421		1.02972	61.667		2.07891	38.2751		54.3149	38.2751		0.749631	38.2751
		4.0117	62.1645		64.5336	62.1645		1.51311	80.597		1.41051	70		1.02972	48.9955		21.0166	48.9955		1.15478	48.9955
		2.91594	61.8944		47.1115	61.8944		4.76887	46.5517		5.74323	96.875		1.42891	47.2519		30.2403	47.2519		1.34732	47.2519
		3.70882	41.9582		88.3932	41.9582		0.697021	94.6		2.31208	90		2.3655	128.455		18.415	128.455		1.1575	128.455
		1.03165	64.7561		15.9313	64.7561		3.56705	32.15		1.3388	85		2.38235	92.7707		25.68	92.7707		1.92928	92.7707
		1.51311	53.9627		28.0399	53.9627		1.64436	49.0909		2.08897	95.8333		3.79031	174.454		21.7267	174.454		1.58301	174.454
		4.76887	77.3612		61.6442	77.3612		0.401286	69.2308		2.67722	35		2.2505	101.03		22.2756	101.03		1.1373	101.03
		0.697021	86.1309		8.09258	86.1309		2.27537	80.5825		2.21738	97.143		5.21157	111.683		46.664	111.683		1.07855	111.683
		1.08914	187.202		5.81799	187.202		0.5239	82.6923		1.55529	50.8333		2.49762	143.19		17.4427	143.19		0.913811	143.19
		0.173547	209.61		0.827952	209.61		2.03027	94.92		1.07282	37.037		5.57523	235.267		23.6975	235.267		1.11143	235.267
		0.214959	155.783		1.37986	155.783		0.878803	96.053		1.00076	90.91		2.23814	210.015		10.657	210.015		1.72115	210.015
		0.730846	261.738		2.79228	261.738					1.1099	43.2432		1.1564	314.007		3.68272	314.007		2.14271	314.007
		1.20533	154.529		7.80002	154.529					1.49392	94.4445		2.02181	338.31		5.97621	338.31		2.47891	338.31
		1.71105	279.524		6.1213	279.524					2.45139	95		2.60898	881.589		2.95941	881.589		4.19735	881.589
		0.338089	314.012		1.07668	314.012					2.31032	95.5414
		0.243122	283.565		0.857377	283.565					2.42665	90
		0.423081	244.595		1.72972	244.595					3.84115	87
											5.26353	88.75
