# Supplementary material for: Mixed synapses reconcile violations of the size principle in zebrafish spinal cord
Source: eLife. 2022 Sep 27;11:e64063. doi: 10.7554/eLife.64063 (PMC9514842; doi:10.7554/eLife.64063)
Supplement: Figure 3—source data 1. [file elife-64063-fig3-data1.xlsx]

## Sheet: Figure 3-source data 1
	Panel d						Panel e									Panel f										Panel h
		100x convergence	50x convergenc	10x convergence	0x convergence		100x convergence		50x convergence		10x convergence		0x convergence				100x convergence		50x convergence		10x convergence		0x convergence				Input 10	Input 7	Input 4	Input 2	Input 1
	Soma diameter (mm)	Rin (GW)	Rin (GW)	Rin (GW)	Rin (GW)		Delta Rin (% control)	Control Rin	Delta Rin (% control)	Control Rin	Delta Rin (% control)	Control Rin	Delta Rin (% control)	Control Rin		Soma diameter (mm)	Decay tau (ms)	Rin (GW)	Decay tau (ms)	Rin (GW)	Decay tau (ms)	Rin (GW)	Decay tau (ms)	Rin (GW)		Soma diameter (mm)	Max val (mV)	Max val (mV)	Max val (mV)	Max val (mV)	Max val (mV)
	10	0.1853	0.3048	0.6839	1.06116		572.671	0.1853	348.15	0.3048	155.163	0.6839	100	1.06116		10	1.44	0.1853	1.56	0.3048	3.01	0.6839	6.748	1.06116		10	2.6541	0.0457	0.0095	0.0009	0.0001
	9	0.23618	0.38962	0.86816	1.31004		554.679	0.23618	336.235	0.38962	150.898	0.86816	100	1.31004		9	1.46	0.23618	1.62	0.38962	3.27	0.86816	6.748	1.31004		9	0.1048	0.0492	0.0102	0.001	0.0001
	8	0.31688	0.52236	1.13994	1.658		523.226	0.31688	317.406	0.52236	145.446	1.13994	100	1.658		8	1.47	0.31688	1.64	0.52236	3.42	1.13994	6.748	1.658		8	0.1005	0.0529	0.011	0.0011	0.0001
	7	0.45622	0.74598	1.56094	2.1655		474.661	0.45622	290.289	0.74598	138.731	1.56094	100	2.1655		7	1.51	0.45622	1.75	0.74598	3.78	1.56094	6.748	2.1655		7	0.0948	3.888	0.0118	0.0011	0.0001
	6	0.719	1.15188	2.24812	2.94742		409.933	0.719	255.879	1.15188	131.106	2.24812	100	2.94742		6	1.55	0.719	1.98	1.15188	4.24	2.24812	6.748	2.94742		6	0.0869	0.0521	0.0126	0.0012	0.0001
	5	1.26646	1.95174	3.44558	4.24422		335.125	1.26646	217.458	1.95174	123.179	3.44558	100	4.24422		5	1.62	1.26646	2.36	1.95174	4.75	3.44558	6.748	4.24422		5	0.0761	0.0457	0.0132	0.0013	0.0001
	4	2.55404	3.69444	5.73442	6.6315		259.647	2.55404	179.499	3.69444	115.644	5.73442	100	6.6315		4	2	2.55404	2.95	3.69444	5.3	5.73442	6.748	6.6315		4	0.0618	0.0372	5.8704	0.0013	0.0001
	3	6.10888	8.05838	10.802	11.7892		192.985	6.10888	146.298	8.05838	109.139	10.802	100	11.7892		3	2.7	6.10888	3.81	8.05838	5.84	10.802	6.748	11.7892		3	0.0439	0.0265	0.0096	0.0013	0.0001
	2	18.6724	21.9267	25.4652	26.5257		142.058	18.6724	120.974	21.9267	104.164	25.4652	100	26.5257		2	3.91	18.6724	4.96	21.9267	6.3	25.4652	6.748	26.5257		2	0.024	0.0145	0.0053	7.4889	0.0001
	1	95.9424	100.772	104.995	106.103		110.59	95.9424	105.29	100.772	101.055	104.995	100	106.103		1	5.67	95.9424	6.07	100.772	6.63	104.995	6.748	106.103		1	0.007	0.0042	0.0016	0.0003	8.111
